# Supplementary material
Source: MDPI journal article supplement (https://www.mdpi.com/1424-8247/16/10/1495)
Supplement: s1 [file s1]

**Fig. S1. Influences of mobile phase additives: (a) 0.1% formic acid, (b) 0.1% trifluoroacetic acid, and (c) 0.1% heptafluorobutyric acid**

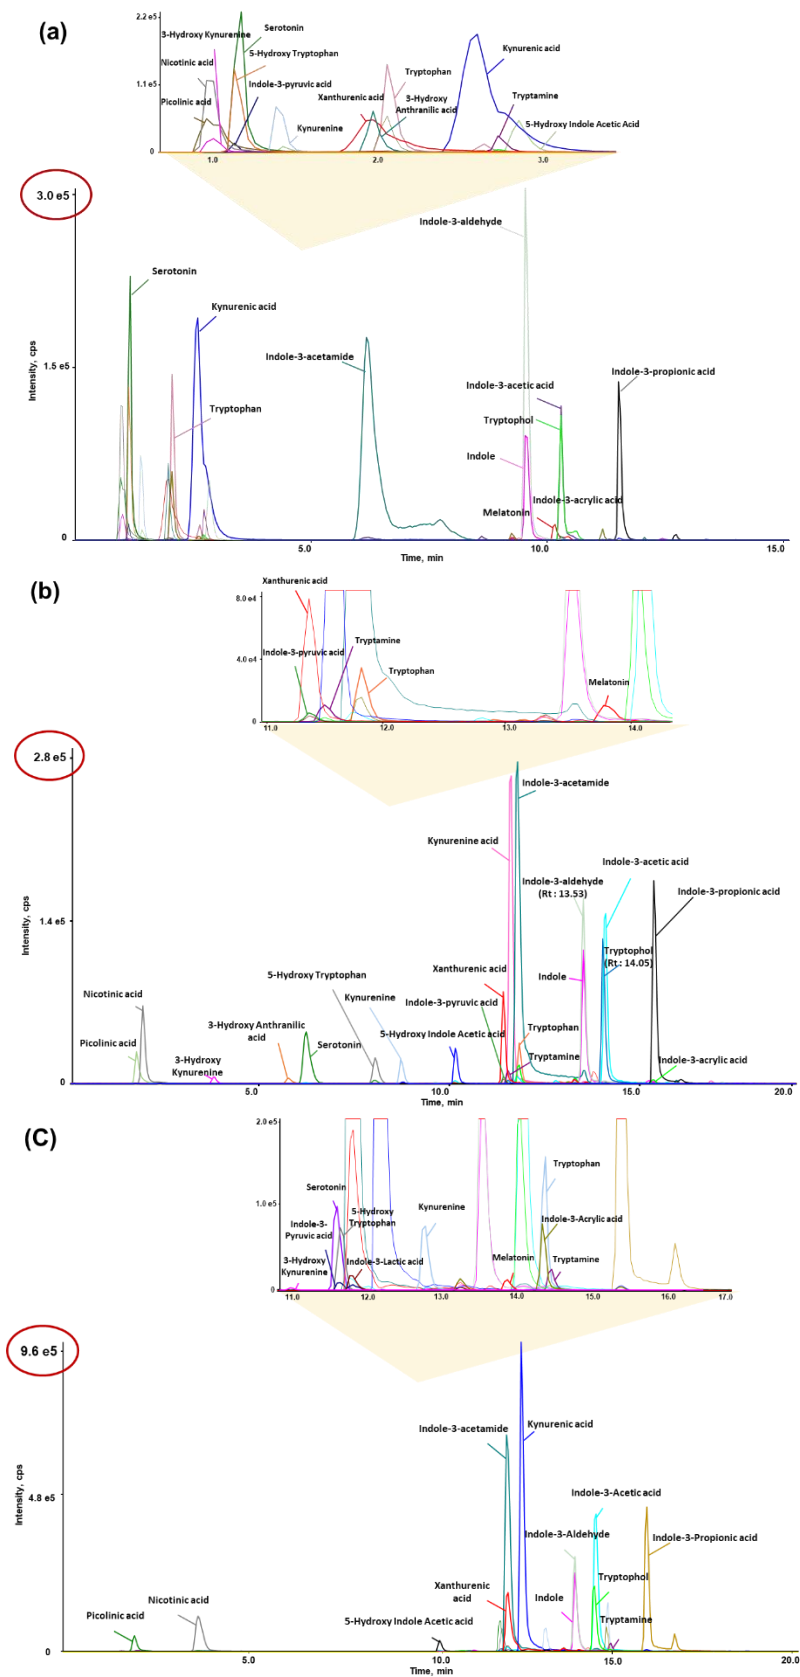

**Fig. S2. Overlaid MRM chromatograms of standard mixture of 21 tryptophan metabolites.**

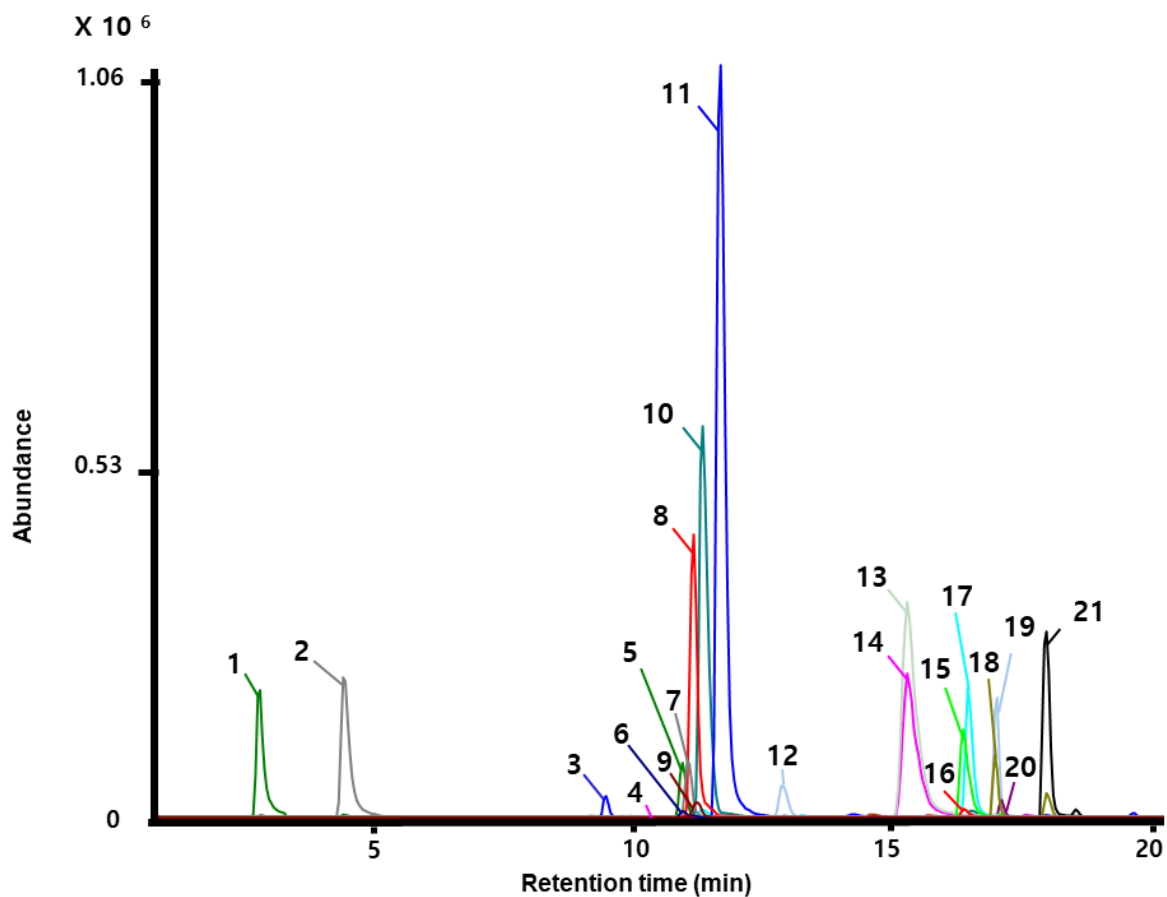

\* The peaks were identified as follows; 1. picolinic acid, 2. nicotinic acid, 3. 5-hydroxyl indole acetic acid, 4. 3-hydroxy kynurenine, 5. serotonin, 6. indole-3-pyruvic acid, 7. 5-hydroxy tryptophan, 8. xanthurenic acid, 9. indole-3-lactic acid, 10. indole-3-acetamide, 11. kynurenic acid, 12. kynurenine, 13. indole-3-aldehyde, 14. indole, 15. tryptophol, 16. melatonin, 17. indole-3-acetic acid, 18. indole-3-acrylic acid, 19. tryptophan, 20. tryptamine, 21. indole-3-propionic acid

**Fig. S3. Overlaid MRM chromatograms of 21 tryptophan metabolites in human urine sample.**

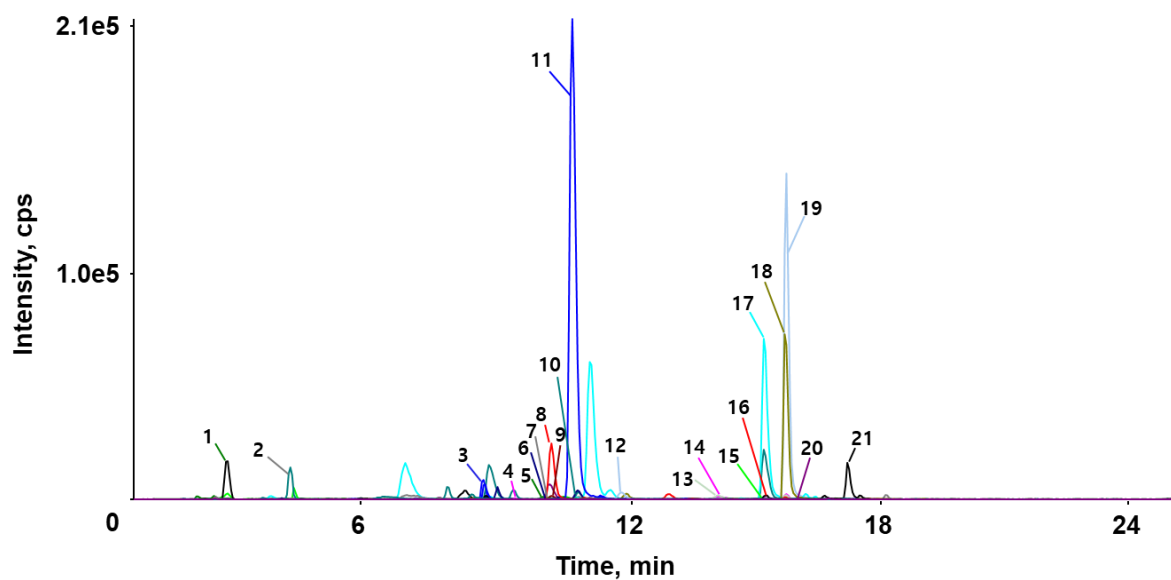

\* The peaks were identified as follows; 1. picolinic acid, 2. nicotinic acid, 3. 5-hydroxyl indole acetic acid, 4. 3-hydroxy kynurenine, 5. serotonin, 6. indole-3-pyruvic acid, 7. 5-hydroxy tryptophan, 8. xanthurenic acid, 9. indole-3-lactic acid, 10. indole-3-acetamide, 11. kynurenic acid, 12. kynurenine, 13. indole-3-aldehyde, 14. indole, 15. tryptophol, 16. melatonin, 17. indole-3-acetic acid, 18. indole-3-acrylic acid, 19. tryptophan, 20. tryptamine, 21. indole-3-propionic acid

**Fig. S4. Heat-map analysis for 21 tryptophan metabolites in urine samples.**

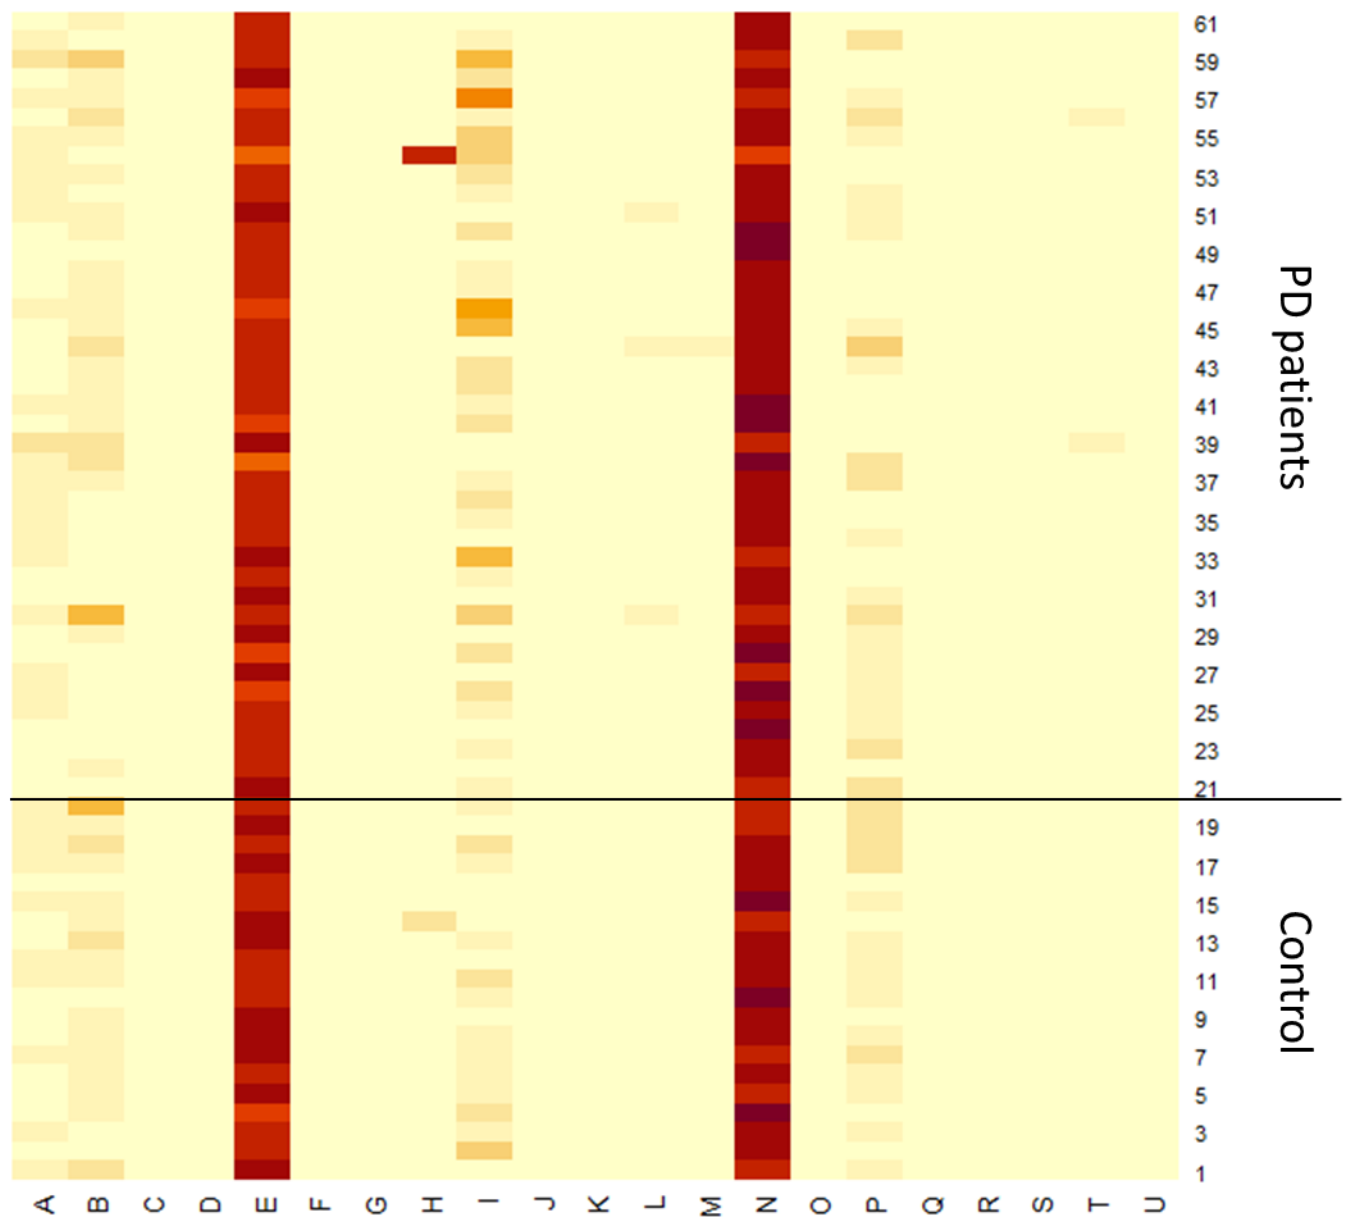

\* The alphabetics were identified as follows; A. 5-hydroxyl indole acetic acid, B. melatonin, C. serotonin, D. 5-hydroxy tryptophan, E. tryptophan, F. indole, G. indole-3-acetamide, H. tryptamine, I. indole-3-acetic acid, J. indole-3-aldehyde, K. tryptophol, L. indole-3-pyruvic acid, M. indole-3-lactic acid, N. indole-3-acrylic acid, O. indole-3-propionic acid, P. kynurenic acid, Q. xanthurenic acid, R. picolinic acid, S. nicotinic acid, T. kynurenine, U. 3-hydroxy kynurenine.

Fig. S5. Heat-map for stability and matrix effect of 21 tryptophan metabolites.

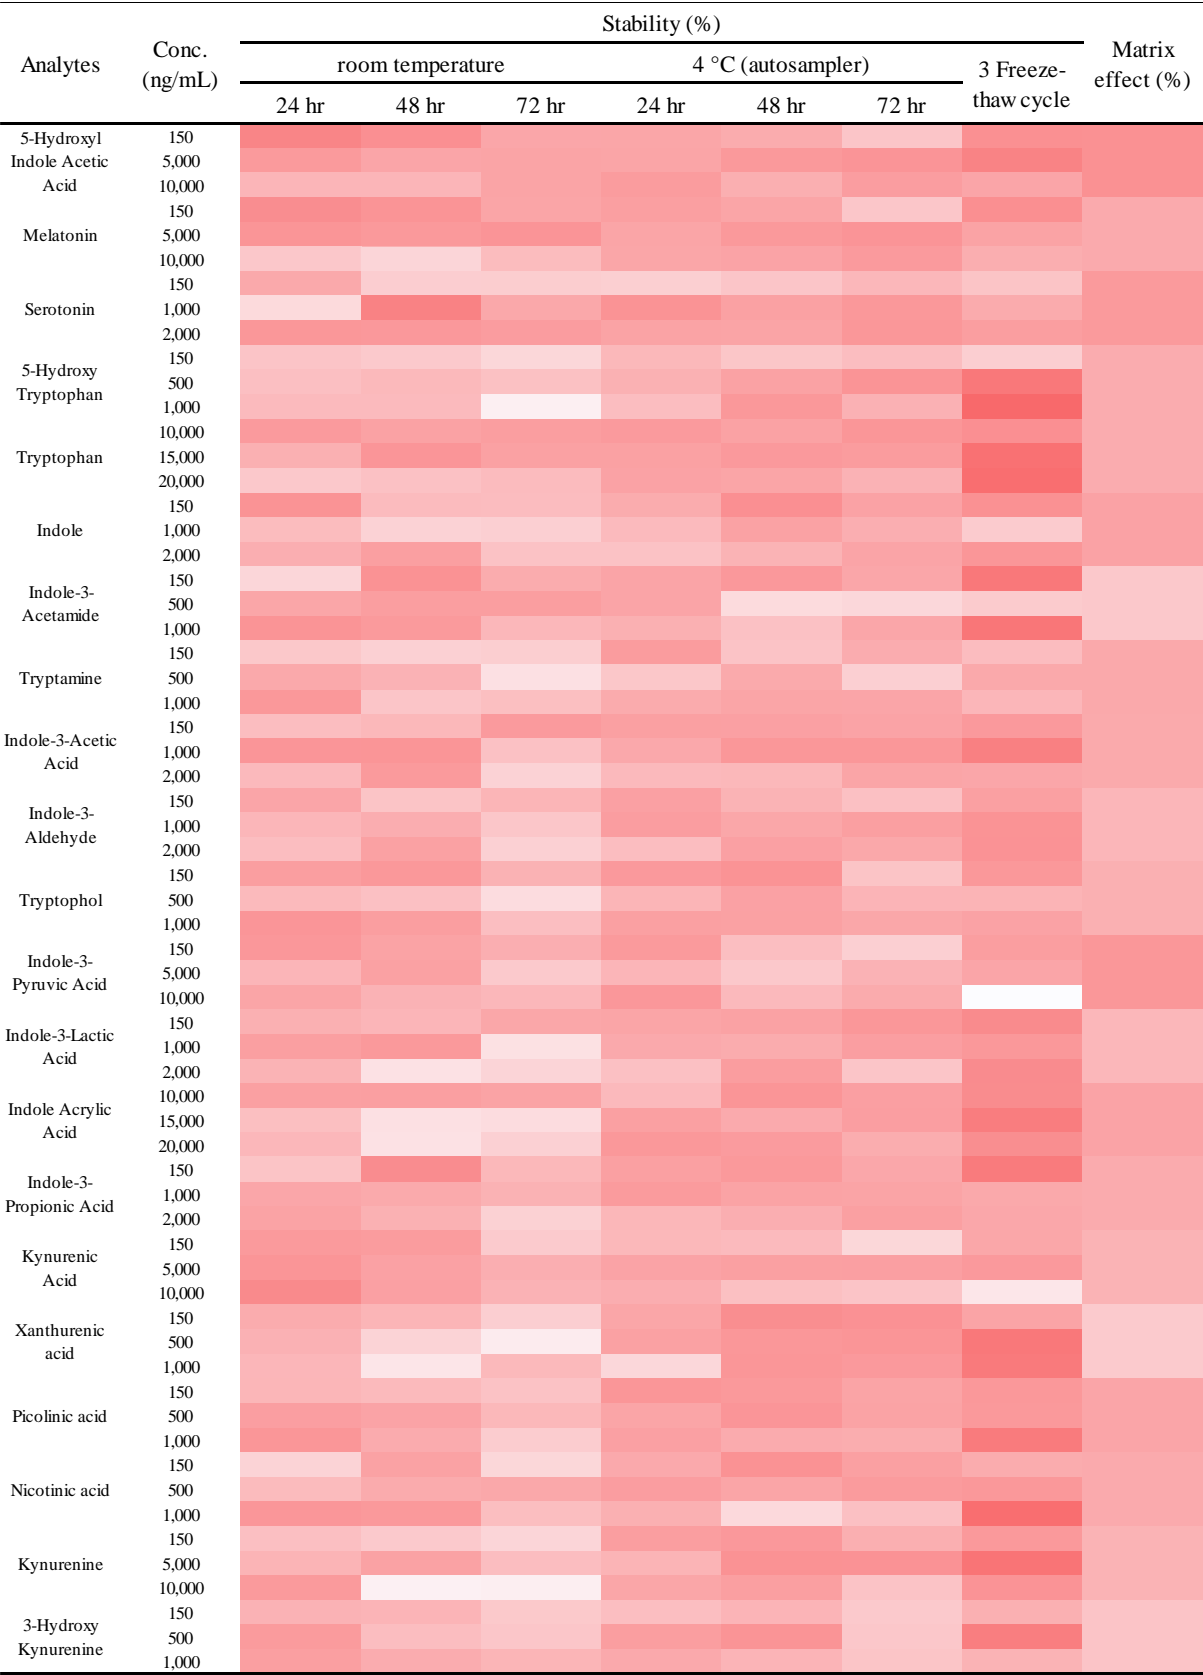

**Table S1. Analytical characteristics of the established method for biological samples.**

| Analytes                | Calibration<br>range<br>(ng/mL) | Linear regression<br>equation | R <sup>2</sup> | LODs<br>(ng/mL) | LOQs<br>(ng/mL) | Spiked Concentration<br>(ng/mL) | Intra-day assay<br>(%) | Inter-day assay<br>(%) | Recovery (%) |
|-------------------------|---------------------------------|-------------------------------|----------------|-----------------|-----------------|---------------------------------|------------------------|------------------------|--------------|
| 5-Hydroxyl              |                                 |                               |                |                 |                 | 150                             | 107.9 (4.7)            | 113.0 (14.3)           | 87.8         |
| Indole                  | 150-10000                       | y = 0.0182x + 0.8708          | 0.997          | 5               | 20              | 5,000                           | 97.9 (1.8)             | 98.3 (5.3)             | 103.2        |
| Acetic Acid             |                                 |                               |                |                 |                 | 10,000                          | 87.6 (6.3)             | 87.0 (3.9)             | 85.8         |
|                         |                                 |                               |                |                 |                 | 150                             | 110.2 (7.5)            | 113.8 (12.9)           | 91.1         |
| Melatonin               | 150-10000                       | y = 0.0141x + 1.4036          | 0.998          | 25              | 75              | 5,000                           | 89.2 (1.0)             | 89.7 (5.2)             | 99.9         |
|                         |                                 |                               |                |                 |                 | 10,000                          | 87.3 (3.3)             | 85.5 (4.5)             | 94.4         |
|                         |                                 |                               |                |                 |                 | 150                             | 96.7 (4.9)             | 92.2 (13.7)            | 108.0        |
| Serotonin               | 150-2000                        | y = 0.0376x + 1.154           | 0.998          | 5               | 20              | 1,000                           | 90.0 (8.9)             | 93.6 (13.9)            | 99.1         |
|                         |                                 |                               |                |                 |                 | 2,000                           | 95.8 (7.1)             | 96.0 (6.7)             | 105.0        |
|                         |                                 |                               |                |                 |                 | 150                             | 97.4 (3.3)             | 99.6 (9.6)             | 87.5         |
| 5-Hydroxy<br>Tryptophan | 150-1000                        | y = 0.0385x + 1.2631          | 0.996          | 25              | 75              | 500                             | 88.1 (6.6)             | 86.2 (6.8)             | 109.9        |
|                         |                                 |                               |                |                 |                 | 1,000                           | 100.5 (9.3)            | 114.1 (11.6)           | 97.8         |
|                         |                                 |                               |                |                 |                 | 10,000                          | 96.5 (3.2)             | 90.5 (5.9)             | 93.6         |
| Tryptophan              | 10000-<br>20000                 | y = 0.0558x + 1.8818          | 0.999          | 1               | 3               | 15,000                          | 106.9 (12.8)           | 112.7 (11.8)           | 91.4         |
|                         |                                 |                               |                |                 |                 | 20,000                          | 113.5 (4.1)            | 114.4 (9.1)            | 94.9         |
|                         |                                 |                               |                |                 |                 | 150                             | 105.7 (3.3)            | 114.3 (7.1)            | 89.6         |
| Indole                  | 150-2000                        | y = 0.0823x + 6.4491          | 0.998          | 1               | 5               | 1,000                           | 113.3 (9.0)            | 111.7 (9.0)            | 108.9        |
|                         |                                 |                               |                |                 |                 | 2,000                           | 89.8 (9.8)             | 97.6 (13.2)            | 89.4         |
|                         |                                 |                               |                |                 |                 | 150                             | 108.0 (6.4)            | 114.1 (11.2)           | 82.5         |
| Indole-3-<br>Acetamide  | 150-1000                        | y = 0.0719x + 28.566          | 0.991          | 1               | 5               | 500                             | 110.1 (12.2)           | 103.5 (14.3)           | 86.8         |
|                         |                                 |                               |                |                 |                 | 1,000                           | 95.7 (1.5)             | 95.7 (1.5)             | 83.7         |

|                         |             |                        |       |    |     |        |              |              |       |
|-------------------------|-------------|------------------------|-------|----|-----|--------|--------------|--------------|-------|
| Tryptamine              | 150-1000    | $y = 0.0049x + 1.5384$ | 0.999 | 25 | 100 | 150    | 98.7 (4.0)   | 109.0 (12.0) | 94.7  |
|                         |             |                        |       |    |     | 500    | 98.7 (11.5)  | 99.4 (8.1)   | 90.9  |
|                         |             |                        |       |    |     | 1,000  | 101.7 (1.8)  | 102.9 (5.6)  | 86.3  |
| Indole-3-Acetic Acid    | 150-2000    | $y = 0.0554x + 28.651$ | 0.991 | 1  | 5   | 150    | 101.6 (1.6)  | 103.5 (12.6) | 93.1  |
|                         |             |                        |       |    |     | 1,000  | 103.7 (6.0)  | 101.7 (6.2)  | 96.7  |
|                         |             |                        |       |    |     | 2,000  | 94.5 (12.8)  | 102.9 (13.4) | 90.2  |
| Indole-3-Aldehyde       | 150-2000    | $y = 0.0562x + 5.8258$ | 0.999 | 25 | 100 | 150    | 109.7 (2.8)  | 110.5 (12.7) | 94.6  |
|                         |             |                        |       |    |     | 1,000  | 108.8 (8.9)  | 106.0 (7.1)  | 85.3  |
|                         |             |                        |       |    |     | 2,000  | 93.9 (10.7)  | 102.2 (13.3) | 90.7  |
| Tryptophol              | 150-1000    | $y = 0.0582x + 1.843$  | 0.990 | 5  | 10  | 150    | 100.5 (10.6) | 114.1 (10.6) | 97.5  |
|                         |             |                        |       |    |     | 500    | 111.6 (3.8)  | 114.0 (5.5)  | 104.6 |
|                         |             |                        |       |    |     | 1,000  | 95.8 (8.0)   | 92.7 (6.5)   | 89.5  |
| Indole-3-Pyruvic Acid   | 150-10000   | $y = 0.0086x - 0.0033$ | 0.996 | 50 | 150 | 150    | 110.7 (11.5) | 113.2 (11.1) | 92.9  |
|                         |             |                        |       |    |     | 5,000  | 89.1 (7.3)   | 90.7 (12.9)  | 87.9  |
|                         |             |                        |       |    |     | 10,000 | 97.1 (3.2)   | 89.6 (11.6)  | 94.3  |
| Indole-3-Lactic Acid    | 150-2000    | $y = 0.0039x + 0.2053$ | 0.996 | 1  | 150 | 150    | 88.0 (10.6)  | 86.2 (6.0)   | 97.1  |
|                         |             |                        |       |    |     | 1,000  | 93.9 (10.4)  | 92.0 (6.7)   | 92.6  |
|                         |             |                        |       |    |     | 2,000  | 91.7 (9.3)   | 90.1 (13.2)  | 97.0  |
| Indole Acrylic Acid     | 10000-20000 | $y = 0.0094x + 0.9321$ | 0.998 | 1  | 5   | 10,000 | 100.9 (13.8) | 102.6 (12.8) | 102.6 |
|                         |             |                        |       |    |     | 15,000 | 89.3 (4.3)   | 85.9 (13.0)  | 103.1 |
|                         |             |                        |       |    |     | 20,000 | 94.0 (5.0)   | 86.0 (6.4)   | 84.1  |
| Indole-3-Propionic Acid | 150-2000    | $y = 0.0627x + 5.0551$ | 0.995 | 1  | 5   | 150    | 110.1 (11.4) | 111.8 (14.1) | 91.8  |
|                         |             |                        |       |    |     | 1,000  | 99.8 (2.7)   | 106.4 (7.1)  | 98.8  |
|                         |             |                        |       |    |     | 2,000  | 103.6 (2.5)  | 98.9 (14.3)  | 89.1  |
| Kynurenic Acid          | 150-10000   | $y = 0.134x + 1.677$   | 0.995 | 1  | 5   | 150    | 99.9 (11.8)  | 100.2 (11.6) | 88.4  |
|                         |             |                        |       |    |     | 5,000  | 108.5 (2.0)  | 104.3 (5.7)  | 89.1  |
|                         |             |                        |       |    |     | 10,000 | 92.5 (7.1)   | 86.9 (10.2)  | 84.7  |
| Xanthurenic acid        | 150-1000    | $y = 0.1819x - 7.9971$ | 0.997 | 1  | 3   | 150    | 88.0 (10.0)  | 88.8 (6.2)   | 104.8 |
|                         |             |                        |       |    |     | 500    | 107.6 (13.0) | 102.2 (9.3)  | 101.3 |
|                         |             |                        |       |    |     | 1,000  | 111.0 (13.8) | 107.2 (13.7) | 87.9  |

|                      |           |                        |       |     |     |        |             |              |       |
|----------------------|-----------|------------------------|-------|-----|-----|--------|-------------|--------------|-------|
| Picolinic acid       | 150-1000  | $y = 0.0184x - 2.1014$ | 0.991 | 50  | 75  | 150    | 113.2 (3.3) | 114.4 (3.9)  | 100.0 |
|                      |           |                        |       |     |     | 500    | 89.5 (13.3) | 94.8 (12.9)  | 89.6  |
|                      |           |                        |       |     |     | 1,000  | 96.0 (6.2)  | 103.9 (10.6) | 84.6  |
| Nicotinic acid       | 150-1000  | $y = 0.009x - 0.2465$  | 0.994 | 150 | 300 | 150    | 107.5 (8.9) | 112.0 (9.7)  | 113.2 |
|                      |           |                        |       |     |     | 500    | 102.6 (1.4) | 105.3 (12.2) | 94.6  |
|                      |           |                        |       |     |     | 1,000  | 112.0 (1.8) | 109.3 (13.7) | 87.5  |
| Kynurenine           | 150-10000 | $y = 0.0263x + 0.7919$ | 0.992 | 10  | 20  | 150    | 86.3 (4.8)  | 86.9 (4.3)   | 93.4  |
|                      |           |                        |       |     |     | 5,000  | 104.9 (7.3) | 98.4 (10.5)  | 86.9  |
|                      |           |                        |       |     |     | 10,000 | 100.9 (0.8) | 101.1 (3.8)  | 99.5  |
| 3-Hydroxy Kynurenine | 150-1000  | $y = 0.0029x - 0.2752$ | 0.991 | 150 | 300 | 150    | 94.2 (9.6)  | 86.6 (12.6)  | 82.7  |
|                      |           |                        |       |     |     | 500    | 109.4 (3.2) | 112.2 (11.8) | 82.8  |
|                      |           |                        |       |     |     | 1,000  | 86.1 (1.9)  | 93.4 (13.5)  | 82.5  |



**Table S2. Stability and matrix effect of tryptophan metabolites in spiked urine sample.**

| Analytes                | Conc.<br>(ng/mL) | Stability (%)    |       |       |                    |       |       |                     | Matrix effect (%) |
|-------------------------|------------------|------------------|-------|-------|--------------------|-------|-------|---------------------|-------------------|
|                         |                  | room temperature |       |       | 4 °C (autosampler) |       |       | 3 Freeze-thaw cycle |                   |
|                         |                  | 24 hr            | 48 hr | 72 hr | 24 hr              | 48 hr | 72 hr |                     |                   |
| 5-Hydroxyl              | 150              | 108.1            | 104.7 | 97.3  | 97.5               | 95.5  | 87.1  | 104.5               | 104.3             |
| Indole Acetic           | 5,000            | 101.4            | 97.6  | 98.1  | 97.7               | 101.6 | 103.1 | 108.8               |                   |
| Acid                    | 10,000           | 92.4             | 92.4  | 98.1  | 100.7              | 94.5  | 100.2 | 97.6                |                   |
| Melatonin               | 150              | 105.4            | 103.2 | 97.7  | 99.7               | 97.7  | 86.8  | 105.0               | 95.9              |
|                         | 5,000            | 103.0            | 101.6 | 103.1 | 97.7               | 101.6 | 103.1 | 98.3                |                   |
|                         | 10,000           | 86.5             | 82.0  | 90.3  | 97.4               | 98.2  | 101.2 | 94.8                |                   |
| Serotonin               | 150              | 96.4             | 84.5  | 84.7  | 84.1               | 87.2  | 91.7  | 87.7                | 101.3             |
|                         | 1,000            | 80.5             | 109.2 | 96.8  | 103.7              | 99.1  | 101.9 | 95.7                |                   |
|                         | 2,000            | 102.2            | 101.8 | 100.5 | 98.4               | 98.0  | 102.3 | 100.0               |                   |
| 5-Hydroxy<br>Tryptophan | 150              | 87.5             | 85.8  | 81.5  | 91.5               | 87.0  | 89.8  | 84.3                | 95.3              |
|                         | 500              | 89.1             | 91.2  | 88.6  | 93.8               | 98.8  | 103.2 | 112.4               |                   |
|                         | 1,000            | 90.8             | 90.8  | 73.4  | 89.8               | 101.9 | 93.6  | 117.1               |                   |
| Tryptophan              | 10,000           | 101.1            | 98.7  | 100.1 | 101.1              | 98.7  | 102.7 | 104.7               | 95.3              |
|                         | 15,000           | 94.2             | 102.8 | 99.0  | 99.0               | 101.5 | 100.6 | 114.6               |                   |
|                         | 20,000           | 86.2             | 88.5  | 90.4  | 98.5               | 97.8  | 93.3  | 115.7               |                   |
| Indole                  | 150              | 103.6            | 90.4  | 90.0  | 95.4               | 104.7 | 98.6  | 104.3               | 98.5              |
|                         | 1,000            | 90.2             | 82.9  | 83.9  | 90.8               | 98.8  | 94.7  | 85.1                |                   |
|                         | 2,000            | 94.6             | 99.6  | 88.1  | 88.1               | 93.1  | 97.9  | 102.6               |                   |
| Indole-3-<br>Acetamide  | 150              | 81.6             | 103.9 | 95.5  | 97.9               | 101.8 | 97.2  | 112.4               | 86.1              |
|                         | 500              | 97.5             | 100.0 | 100.0 | 97.9               | 80.2  | 81.2  | 85.4                |                   |
|                         | 1,000            | 103.3            | 101.3 | 91.7  | 94.2               | 88.5  | 97.3  | 113.0               |                   |

|                                |        |       |       |       |       |       |       |       |       |
|--------------------------------|--------|-------|-------|-------|-------|-------|-------|-------|-------|
|                                | 150    | 86.4  | 83.6  | 84.4  | 100.7 | 87.8  | 95.3  | 90.1  |       |
| Tryptamine                     | 500    | 96.5  | 93.4  | 78.4  | 86.7  | 96.2  | 83.8  | 96.4  | 96.5  |
|                                | 1,000  | 102.0 | 87.2  | 89.3  | 95.7  | 97.8  | 97.6  | 92.0  |       |
|                                | 150    | 89.7  | 91.6  | 101.2 | 99.3  | 99.2  | 98.2  | 101.5 |       |
| Indole-3-<br>Acetic Acid       | 1,000  | 102.8 | 102.9 | 88.5  | 96.6  | 102.3 | 102.3 | 109.9 | 96.1  |
|                                | 2,000  | 91.1  | 101.4 | 82.9  | 91.1  | 91.5  | 97.8  | 97.3  |       |
|                                | 150    | 97.6  | 87.7  | 92.6  | 99.2  | 93.2  | 88.8  | 99.4  |       |
| Indole-3-<br>Aldehyde          | 1,000  | 92.1  | 95.0  | 86.8  | 100.2 | 97.1  | 99.7  | 103.7 | 92.1  |
|                                | 2,000  | 89.7  | 99.0  | 83.6  | 89.7  | 99.2  | 96.7  | 103.8 |       |
|                                | 150    | 100.1 | 101.9 | 93.5  | 101.5 | 103.5 | 87.7  | 102.0 |       |
| Tryptophol                     | 500    | 90.9  | 88.7  | 79.8  | 92.5  | 98.9  | 92.7  | 92.9  | 94.1  |
|                                | 1,000  | 102.8 | 100.1 | 89.4  | 99.4  | 99.1  | 97.1  | 98.5  |       |
|                                | 150    | 102.1 | 98.4  | 94.7  | 101.4 | 89.4  | 83.8  | 100.1 |       |
| Indole-3-<br>Pyruvic Acid      | 5,000  | 92.4  | 99.0  | 85.8  | 92.4  | 86.1  | 93.3  | 97.6  | 102.2 |
|                                | 10,000 | 97.7  | 93.3  | 91.7  | 102.1 | 91.0  | 95.7  | 69.1  |       |
|                                | 150    | 94.2  | 92.3  | 97.1  | 97.8  | 98.8  | 102.2 | 106.2 |       |
| Indole-3-<br>Lactic Acid       | 1,000  | 99.6  | 101.6 | 78.2  | 96.3  | 95.5  | 99.9  | 101.9 | 91.8  |
|                                | 2,000  | 93.1  | 78.0  | 82.3  | 88.7  | 100.4 | 87.2  | 106.0 |       |
|                                | 10,000 | 99.4  | 99.6  | 98.3  | 91.1  | 103.0 | 99.5  | 105.9 |       |
| Indole<br>Acrylic Acid         | 15,000 | 89.3  | 78.5  | 79.7  | 99.3  | 95.9  | 99.9  | 110.8 | 98.2  |
|                                | 20,000 | 91.7  | 78.1  | 83.6  | 101.9 | 100.8 | 95.2  | 105.3 |       |
|                                | 150    | 87.7  | 105.7 | 91.6  | 99.4  | 101.6 | 96.9  | 111.4 |       |
| Indole-3-<br>Propionic<br>Acid | 1,000  | 97.2  | 96.2  | 93.5  | 101.0 | 98.4  | 98.1  | 96.5  | 95.6  |
|                                | 2,000  | 98.3  | 93.9  | 83.4  | 91.9  | 94.7  | 99.3  | 96.9  |       |
|                                | 150    | 101.3 | 100.7 | 85.6  | 91.6  | 90.7  | 81.5  | 97.0  |       |
| Kynurenic<br>Acid              | 5,000  | 103.0 | 98.9  | 94.7  | 98.2  | 99.3  | 99.5  | 101.5 | 93.1  |
|                                | 10,000 | 106.5 | 99.2  | 93.4  | 95.0  | 89.0  | 87.4  | 76.3  |       |
|                                | 150    | 95.5  | 92.5  | 84.2  | 97.4  | 105.1 | 104.1 | 98.0  |       |
| Xanthurenic<br>acid            | 500    | 93.7  | 82.6  | 74.8  | 99.1  | 102.3 | 103.0 | 112.4 | 85.5  |
|                                | 1,000  | 92.1  | 76.7  | 91.3  | 81.2  | 102.6 | 101.5 | 111.6 |       |
|                                | 150    | 92.2  | 90.9  | 88.2  | 102.6 | 101.6 | 98.1  | 101.9 |       |
| Picolinic acid                 | 500    | 99.9  | 98.2  | 91.6  | 97.8  | 102.8 | 98.3  | 101.6 | 97.6  |

|                      |        |       |       |      |       |       |       |       |      |
|----------------------|--------|-------|-------|------|-------|-------|-------|-------|------|
| Nicotinic acid       | 1,000  | 102.6 | 95.6  | 84.9 | 99.2  | 95.6  | 95.2  | 111.3 | 96.0 |
|                      | 150    | 82.5  | 98.8  | 81.5 | 96.3  | 103.9 | 99.4  | 95.5  |      |
|                      | 500    | 90.6  | 95.8  | 96.8 | 100.2 | 97.8  | 101.0 | 102.0 |      |
| Kynurenine           | 1,000  | 102.5 | 101.7 | 89.6 | 94.1  | 80.6  | 88.8  | 115.5 | 93.2 |
|                      | 150    | 89.2  | 85.8  | 82.0 | 100.0 | 101.8 | 94.5  | 101.7 |      |
|                      | 5,000  | 92.9  | 98.8  | 89.7 | 92.9  | 103.9 | 103.8 | 113.7 |      |
|                      | 10,000 | 101.3 | 73.3  | 73.8 | 97.4  | 99.6  | 87.9  | 103.4 |      |
| 3-Hydroxy Kynurenine | 150    | 93.4  | 92.7  | 86.0 | 89.5  | 92.7  | 85.8  | 94.1  | 87.5 |
|                      | 500    | 101.0 | 89.7  | 86.9 | 100.0 | 103.3 | 86.6  | 110.5 |      |
|                      | 1,000  | 99.7  | 95.3  | 92.6 | 96.3  | 92.7  | 87.3  | 93.1  |      |

**Table S3. Information for collected urine samples.**

| <b>Samples</b> |        | <b>Control group</b> | <b>PD patients</b> |
|----------------|--------|----------------------|--------------------|
| Sex            | Male   | 13                   | 16                 |
|                | Female | 7                    | 25                 |
| Age            |        | 69.69±6.76           | 65.05±7.76         |

**Table S4. MS parameters for multiple reaction monitoring mode.**

| Compound name                 | Declustering Potential<br>(DP) | Entrance Potential<br>(EP) | Quantifier ion<br>transition | Collision<br>Energy | Qualifier ion<br>transition | Collision<br>Energy |
|-------------------------------|--------------------------------|----------------------------|------------------------------|---------------------|-----------------------------|---------------------|
| 5-Hydroxyl indole acetic acid | 30                             | 4                          | 192 > 146                    | 30                  | 192 > 119                   | 30                  |
| Melatonin                     | 40                             | 7                          | 233 > 173                    | 24                  | 233 > 159                   | 24                  |
| Serotonin                     | 30                             | 4                          | 177 > 160                    | 20                  | 177 > 132                   | 20                  |
| 5-Hydroxy tryptophan          | 30                             | 5                          | 221 > 161                    | 13                  | 221 > 162                   | 22                  |
| Tryptophan                    | 40                             | 5                          | 205 > 188                    | 20                  | 205 > 146                   | 25                  |
| Indole                        | 40                             | 7                          | 118 > 91                     | 38                  | 118 > 65                    | 41                  |
| Indole-3-acetamide            | 30                             | 6                          | 175 > 130                    | 30                  | 175 > 158                   | 24                  |
| Tryptamine                    | 20                             | 5                          | 161 > 143                    | 16                  | 161 > 117                   | 21                  |
| Indole-3-acetic acid          | 40                             | 7                          | 176 > 130                    | 24                  | 176 > 103                   | 29                  |
| Indole-3-aldehyde             | 40                             | 4                          | 146 > 118                    | 23                  | 146 > 91                    | 31                  |
| Tryptophol                    | 30                             | 5                          | 162 > 90                     | 15                  | 162 > 117                   | 28                  |
| Indole-3-pyruvic acid         | 40                             | 9                          | 204 > 158                    | 27                  | 204 > 130                   | 46                  |
| Indole-3-lactic acid          | 70                             | 12                         | 206 > 143                    | 16                  | 206 > 130                   | 65                  |
| Indole-3-acylic acid          | 50                             | 7                          | 188 > 115                    | 70                  | 188 > 170                   | 22                  |
| Indole-3-propionic acid       | 30                             | 7                          | 190 > 130                    | 19                  | 190 > 79                    | 26                  |
| Kynurenic acid                | 30                             | 9                          | 190 > 144                    | 30                  | 190 > 162                   | 28                  |

|                      |    |   |           |    |           |    |
|----------------------|----|---|-----------|----|-----------|----|
| Xanthurenic acid     | 40 | 6 | 206 > 160 | 33 | 206 > 132 | 34 |
| Picolinic acid       | 30 | 5 | 124 > 78  | 14 | 124 > 78  | 31 |
| Nicotinic acid       | 40 | 6 | 124 > 78  | 32 | 124 > 52  | 43 |
| Kynurenine           | 30 | 7 | 209 > 94  | 23 | 209 > 146 | 22 |
| 3-Hydroxy kynurenine | 30 | 5 | 225 > 110 | 20 | 225 > 161 | 22 |

---
